# Supplementary material for: Red light and biostimulants containing arbuscular mycorrhizal fungi enhance ajmalicine and serpentine production in Catharanthus roseus under indoor conditions
Source: Springer Nature journal article supplement (doi:10.1038/s41598-025-30694-y), 2025-12-06
Supplement: MOESM1 [file 41598_2025_30694_MOESM1_ESM.pdf]

**Table S1. Temporal trends of DWs, SRP and AJM production**

| Variables              | T0          | T1           | Percentage variation |
|------------------------|-------------|--------------|----------------------|
| Leaf DW                | 0.9 ± 0.1   | 3.8 ± 0.2    | +322.2%              |
| Root DW                | 1.0 ± 0.04  | 2.7 ± 0.14   | +170.0%              |
| Total DW               | 1.9 ± 0.1   | 6.4 ± 0.2    | +236.8%              |
| Leaf SRP concentration | 19.9 ± 1.4  | 12.3 ± 0.6   | -39.2%               |
| Root SRP concentration | 113.9 ± 7.0 | 325.0 ± 12.7 | +185.3%              |
| Leaf SRP yield         | 18.2 ± 2.5  | 47.6 ± 3.7   | +161.5%              |
| Root SRP yield         | 21.4 ± 3.8  | 896.0 ± 66.5 | +4086.9%             |
| Total SRP yield        | 39.7 ± 5.5  | 943.7 ± 66.2 | +2277.1%             |
| AJM concentration      | 50.9 ± 4.3  | 153.0 ± 9.9  | +202.4%              |
| AJM yield              | 51.3 ± 4.5  | 418.6 ± 35.9 | +716.0%              |

Values are means ± standard error (n = 5 for T0, n=61 for T1).

### AJM and SRP biosynthetic pathway

In *C. roseus*, TIAs biosynthesis integrates intermediates from both the shikimate/indole pathway, originating from amino acids, and the methylerythritol pathway (MEP)/iridoid pathway, which involves monoterpenoids<sup>1</sup>. The amino acid tryptophan and the monoterpene geraniol serve as crucial precursors in this process. Tryptophan is converted into tryptamine by tryptophan decarboxylase (*TDC*), an upstream enzyme in the TIA pathway. In parallel, geraniol undergoes hydroxylation to 10-hydroxygeraniol catalyzed by geraniol 10-hydroxylase (*G10H*), another upstream enzyme, and is subsequently transformed into secologanin through a series of enzymatic steps. Tryptamine and secologanin are the key intermediates required for the formation of strictosidine, the central precursor for a diverse array of TIAs, such as SRP and AJM. Strictosidine is deglycosylated by strictosidine β-D-glucosidase (*SGD*), a midstream enzyme, yielding the strictosidine aglycone, a highly reactive intermediate that feeds into multiple midstream and downstream biosynthetic routes. One such route leads to the formation of AJM through the reduction of cathenamine, catalyzed by heteroyohimbine synthase (*HYS*), another key midstream enzyme. AJM can subsequently undergo enzymatic oxidation to produce SRP<sup>1,2</sup>.

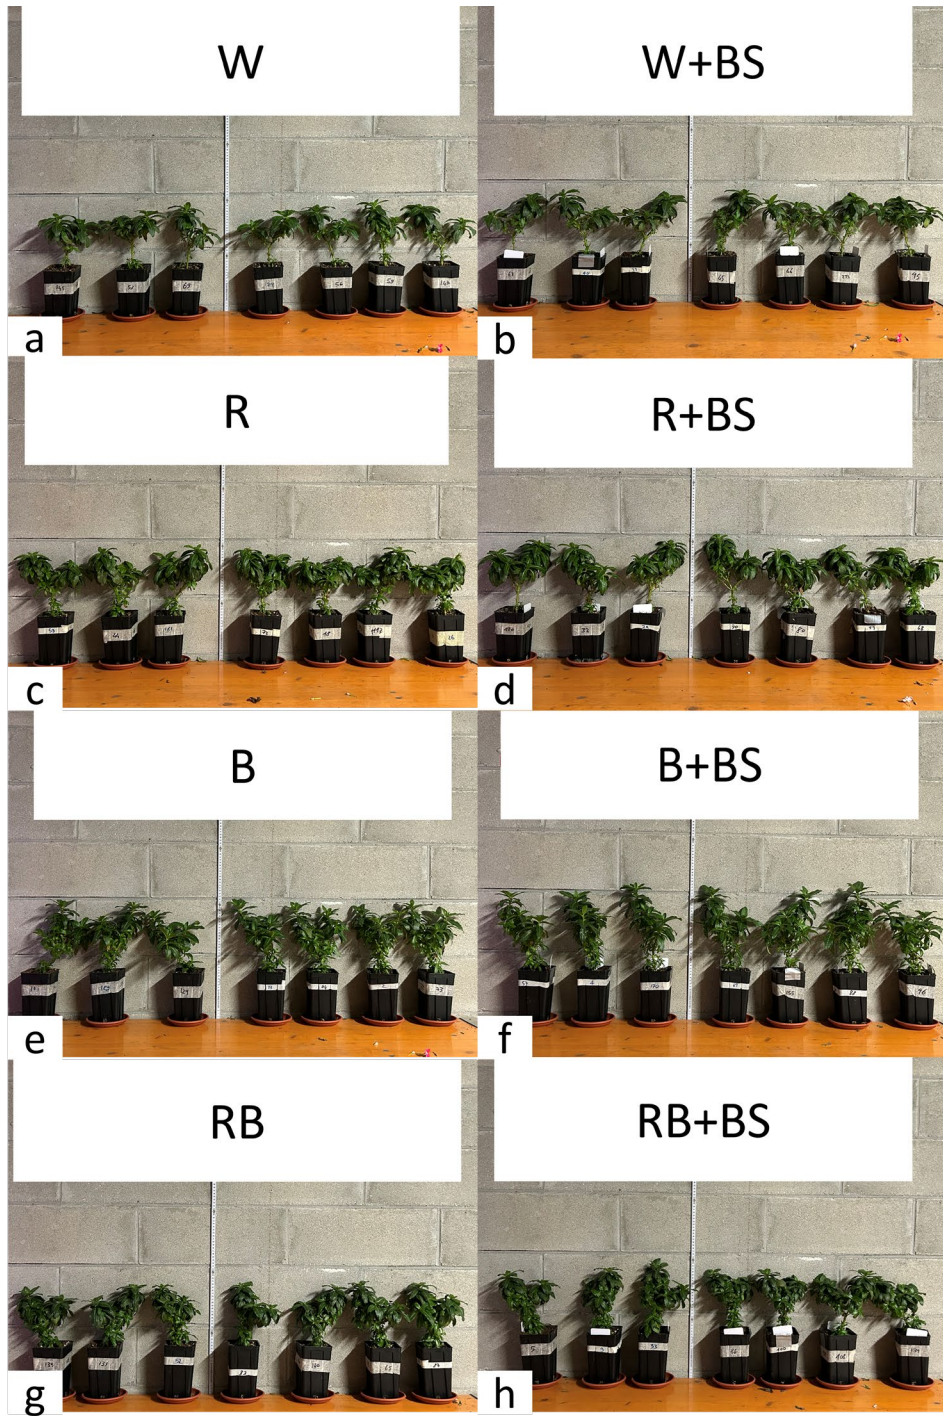

**Figure S1. Growth differences under different LED light spectra and AMF-containing biostimulant (BS) treatments. (a) White light (W), (b) W + BS, (c) red light (R), (d) R + BS, (e) blue light (B), (f) B + BS, (g) red-blue light (RB), (h) RB + BS.**

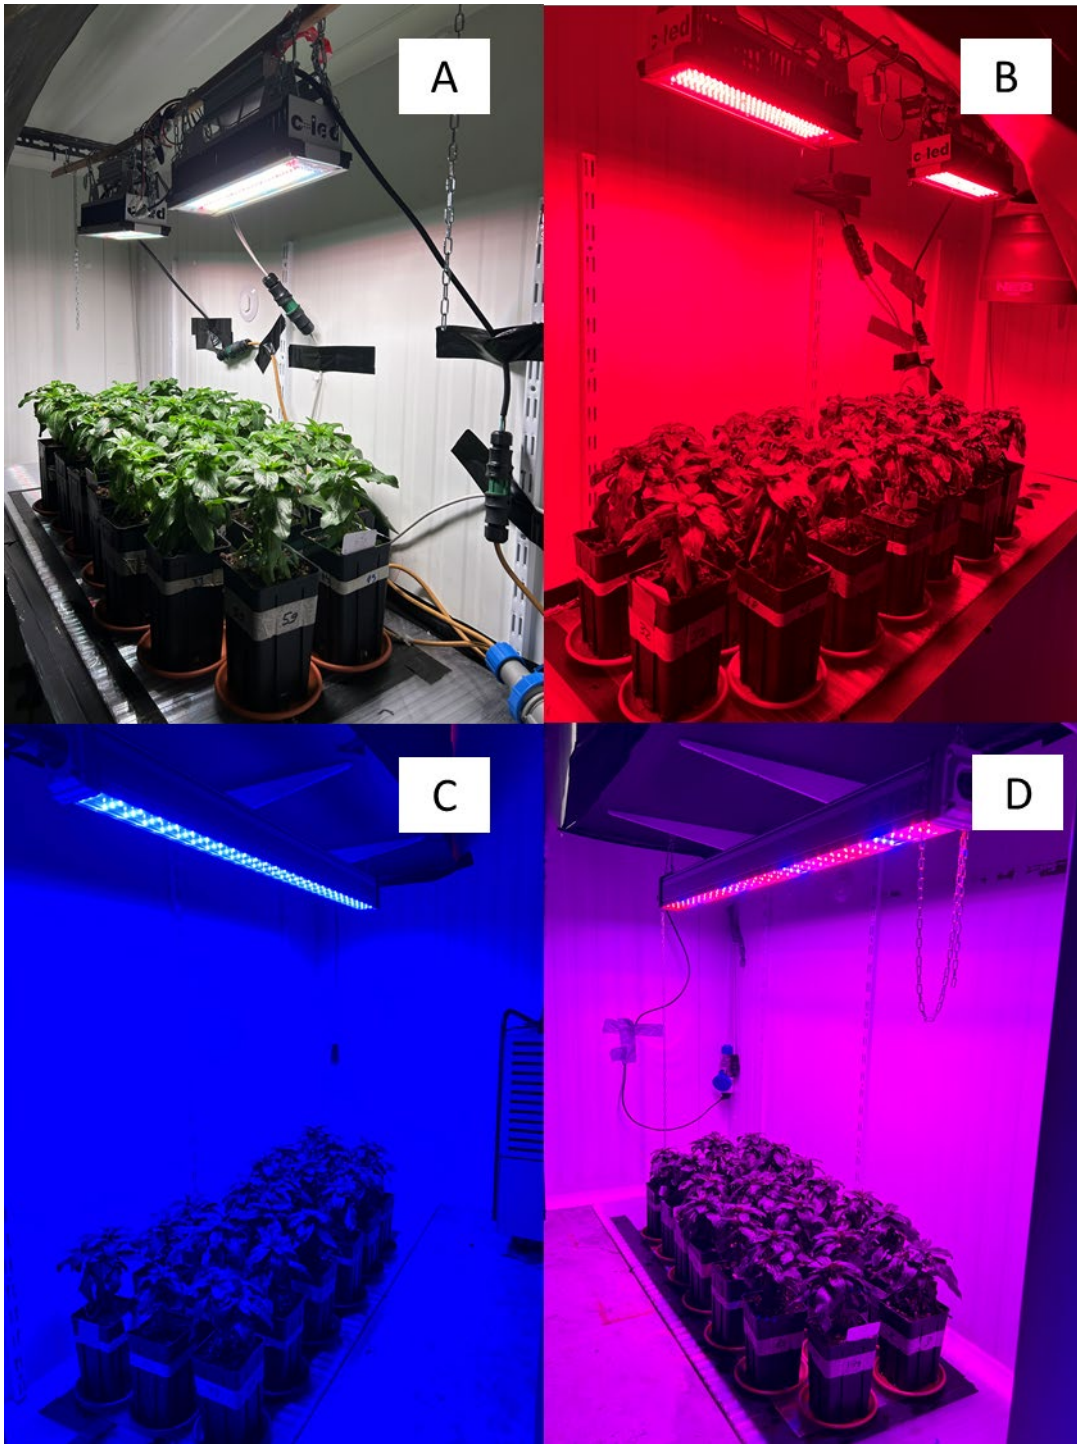

**Figure S2. Plants exposed to the experimental treatments.** The plants were placed under four different LED light sources: white LED light (A), red LED light (B), blue LED light (C), and a combination of blue and red LED light (RB, 6:1) (D). For BS-treated plants, the BS application was performed immediately before exposing the plants to the light treatments. Each pot received a 40-gram dose of the product, distributed into four 10-cm-deep cavities, with 10 grams per cavity, positioned directly beneath the transplanted seedlings.

## References

1. Liu, Y. *et al.* Terpenoid indole alkaloid biosynthesis in *Catharanthus roseus*: effects and prospects of environmental factors in metabolic engineering. *Biotechnology Letters* 2021 43:11 **43**, 2085–2103 (2021).
2. Liu, J., Cai, J., Wang, R. & Yang, S. Transcriptional Regulation and Transport of Terpenoid Indole Alkaloid in *Catharanthus roseus*: Exploration of New Research Directions. *International Journal of Molecular Sciences* 2017, Vol. 18, Page 53 **18**, 53 (2016).
